# Supplementary material
Source: PubMed Central journal article supplement (PMC2562032)
Supplement: NIHMS63374-supplement-03.pdf [file NIHMS63374-supplement-03.pdf]

# **TABLE OF CONTENTS**

(Epistry Version 2 - as of 02/09/2007)

| <b><u>Form #</u></b> | <b><u>Form Name</u></b>  | <b><u>Page #</u></b> |
|----------------------|--------------------------|----------------------|
| 3                    | Patient Enrollment.....  | 1                    |
| 4                    | Pre-hospital Time Record |                      |
|                      | • Cardiac Arrest.....    | 2                    |
|                      | • Trauma.....            | 3                    |
| 5                    | Pre-hospital Data.....   | 4 - 10               |
| 7                    | ED/hospital admit.....   | 11 - 18              |
| 6                    | CPR Process.....         | 19 - 20              |
| 9                    | Trauma Ventilation.....  | 21                   |

**Episode Information:**

Date (mm/dd/yyyy)

/  /

Time call received at dispatch

:  :  (hh:mm:ss; 24hr clock)

- From PCR/other    From dispatch    Unable to obtain (Non-ROC agency 1<sup>st</sup> arrival)

CTC Episode ID:

-  -

Incident Number (optional)

Site Linking ID (optional)

**1. EMS response:** (List vehicles in the order that they arrived at the scene)

|    | Agency Name          | Vehicle Name         | # of Personnel       | Service level         |                       |                       |                       | Time of arrival<br>hh:mm:ss | Source                |                       |                       |
|----|----------------------|----------------------|----------------------|-----------------------|-----------------------|-----------------------|-----------------------|-----------------------------|-----------------------|-----------------------|-----------------------|
|    |                      |                      |                      | BLS                   | BLS-D                 | BLS+                  | ALS                   |                             | Watch                 | Dispatch              | No Time               |
| 1: | <input type="text"/> | <input type="text"/> | <input type="text"/> | <input type="radio"/> | <input type="radio"/> | <input type="radio"/> | <input type="radio"/> | <input type="text"/>        | <input type="radio"/> | <input type="radio"/> | <input type="radio"/> |
| 2: | <input type="text"/> | <input type="text"/> | <input type="text"/> | <input type="radio"/> | <input type="radio"/> | <input type="radio"/> | <input type="radio"/> | <input type="text"/>        | <input type="radio"/> | <input type="radio"/> | <input type="radio"/> |
| 3: | <input type="text"/> | <input type="text"/> | <input type="text"/> | <input type="radio"/> | <input type="radio"/> | <input type="radio"/> | <input type="radio"/> | <input type="text"/>        | <input type="radio"/> | <input type="radio"/> | <input type="radio"/> |
| 4: | <input type="text"/> | <input type="text"/> | <input type="text"/> | <input type="radio"/> | <input type="radio"/> | <input type="radio"/> | <input type="radio"/> | <input type="text"/>        | <input type="radio"/> | <input type="radio"/> | <input type="radio"/> |

**2. Episode characteristics:** (check only one)

- Cardiac arrest -  
 Out-of-hospital cardiac arrest (not associated with burn, blunt or penetrating trauma), evaluated by organized EMS personnel and:
- Treated by EMS - receive attempts at external defibrillation by lay responders or EMS personnel, or receive chest compressions by organized EMS personnel; OR
  - Not treated by EMS - are pulseless but do not receive attempts to defibrillate or CPR by EMS personnel. This group will include patients with do not attempt resuscitative directive signed and dated by a physician, extensive history of terminal illness or intractable disease, or request from the patient's family.
- Traumatic injury -  
 Out-of-hospital injury, evaluated by organized EMS personnel and:
- Meets one or more of the following physiologic criteria documented: (check all that apply)
    - Systolic blood pressure ≤ 90 mmHg
    - Respiratory rate < 10 or > 29
    - Advanced airway
    - Glasgow Coma Scale score ≤ 12
  - Dead in field with EMS treatment and no physiologic criteria documented
  - Dead at scene without EMS treatment
- Number of patients on scene including current patient:  One    Multiple    Not Recorded

**3. Any indication that the patient was enrolled in another clinical trial?**

- No
- Yes, ROC clinical trial
- Cardiac study → PRIMED Study ID:  -  PR -
  - Trauma study → HS Study ID:  -  HS -
- Yes, non-ROC clinical trial → Specify:  (60)

Person responsible for data on this form:

Complete this form:  
 - for each cardiac episode  
 Main data source: PCR  
 Other data source: Dispatch, family members, witnesses

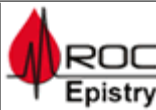

# Pre-hospital Time Record

Cardiac Arrest

Version 2.00.01; Date: 08/14/2007

Page 1 of 1

## Episode Information:

Date (mm/dd/yyyy)  
 /  /

Time call received at dispatch  
 :  :  (hh:mm:ss; 24hr clock)

From PCR/other    From dispatch    Unable to obtain (Non-ROC agency 1<sup>st</sup> arrival)

CTC Episode ID:  
 -  -

Incident Number (optional)

Site Linking ID (optional)

## Time Record:

- Fill in Event Order, Watch time, and/or Dispatch/Defib time for all events that occurred. If an event did not occur, enter "0" for Event Order.
- If the time of event in "Dispatch/Defib" is from Dispatch, enter "0" in the "Source Disp/Defib" box; otherwise enter "1", "2", ... where "1" is the 1st defibrillator used, "2" is the second defibrillator used and so on.
- If the time of event in "Dispatch/Defib" is from a defibrillator and if that defibrillator was synched to the atomic clock, check the "Synched to Atomic Clock" box. If the defibrillator was *not* synched to the atomic clock, enter the probable time in the "Aligned Time" field.
- If no documented time exists (from Watch, Dispatch, or defib) for an event that occurred, fill in event order, leave the time fields blank and check the "No Doc Time" box. The exception is "911 call received at primary PSAP" (enter the event order as "0" if you do not know the time).

### Additional Instructions/Documentation

| Event                             | Event Order<br>1-16<br>0=NA | Time of Event                                                      |                                                                    | Source Disp<br>Defib | Defib<br>Appears<br>Synched<br>to<br>Atomic<br>Clock | No<br>Doc<br>Time        | Computer to generate<br>(you may adjust)                           |                          |
|-----------------------------------|-----------------------------|--------------------------------------------------------------------|--------------------------------------------------------------------|----------------------|------------------------------------------------------|--------------------------|--------------------------------------------------------------------|--------------------------|
|                                   |                             | Watch<br>hh:mm:ss                                                  | Dispatch/Defib<br>hh:mm:ss                                         |                      |                                                      |                          | Aligned Time<br>hh:mm:ss                                           | Adj                      |
| 911 call received at primary PSAP | <input type="text"/>        | <input type="text"/> : <input type="text"/> : <input type="text"/> | <input type="text"/> : <input type="text"/> : <input type="text"/> | <input type="text"/> | <input type="checkbox"/>                             | <input type="checkbox"/> | <input type="text"/> : <input type="text"/> : <input type="text"/> | <input type="checkbox"/> |
| 1st 911 call received at dispatch | <input type="text"/>        | <input type="text"/> : <input type="text"/> : <input type="text"/> | <input type="text"/> : <input type="text"/> : <input type="text"/> | <input type="text"/> | <input type="checkbox"/>                             | <input type="checkbox"/> | <input type="text"/> : <input type="text"/> : <input type="text"/> | <input type="checkbox"/> |
| 1st vehicle dispatch time         | <input type="text"/>        | <input type="text"/> : <input type="text"/> : <input type="text"/> | <input type="text"/> : <input type="text"/> : <input type="text"/> | <input type="text"/> | <input type="checkbox"/>                             | <input type="checkbox"/> | <input type="text"/> : <input type="text"/> : <input type="text"/> | <input type="checkbox"/> |
| 1st vehicle arrival at scene      | <input type="text"/>        | <input type="text"/> : <input type="text"/> : <input type="text"/> | <input type="text"/> : <input type="text"/> : <input type="text"/> | <input type="text"/> | <input type="checkbox"/>                             | <input type="checkbox"/> | <input type="text"/> : <input type="text"/> : <input type="text"/> | <input type="checkbox"/> |
| 1st EMS AED/defib turned on       | <input type="text"/>        | <input type="text"/> : <input type="text"/> : <input type="text"/> | <input type="text"/> : <input type="text"/> : <input type="text"/> | <input type="text"/> | <input type="checkbox"/>                             | <input type="checkbox"/> | <input type="text"/> : <input type="text"/> : <input type="text"/> | <input type="checkbox"/> |
| 1st ALS arrival at scene          | <input type="text"/>        | <input type="text"/> : <input type="text"/> : <input type="text"/> | <input type="text"/> : <input type="text"/> : <input type="text"/> | <input type="text"/> | <input type="checkbox"/>                             | <input type="checkbox"/> | <input type="text"/> : <input type="text"/> : <input type="text"/> | <input type="checkbox"/> |
| Time of arrest if EMS witnessed   | <input type="text"/>        | <input type="text"/> : <input type="text"/> : <input type="text"/> | <input type="text"/> : <input type="text"/> : <input type="text"/> | <input type="text"/> | <input type="checkbox"/>                             | <input type="checkbox"/> | <input type="text"/> : <input type="text"/> : <input type="text"/> | <input type="checkbox"/> |
| 1st CA EMS rhythm                 | <input type="text"/>        | <input type="text"/> : <input type="text"/> : <input type="text"/> | <input type="text"/> : <input type="text"/> : <input type="text"/> | <input type="text"/> | <input type="checkbox"/>                             | <input type="checkbox"/> | <input type="text"/> : <input type="text"/> : <input type="text"/> | <input type="checkbox"/> |
| 1st EMS CPR                       | <input type="text"/>        | <input type="text"/> : <input type="text"/> : <input type="text"/> | <input type="text"/> : <input type="text"/> : <input type="text"/> | <input type="text"/> | <input type="checkbox"/>                             | <input type="checkbox"/> | <input type="text"/> : <input type="text"/> : <input type="text"/> | <input type="checkbox"/> |
| 1st EMS shock assessment          | <input type="text"/>        | <input type="text"/> : <input type="text"/> : <input type="text"/> | <input type="text"/> : <input type="text"/> : <input type="text"/> | <input type="text"/> | <input type="checkbox"/>                             | <input type="checkbox"/> | <input type="text"/> : <input type="text"/> : <input type="text"/> | <input type="checkbox"/> |
| 1st EMS shock                     | <input type="text"/>        | <input type="text"/> : <input type="text"/> : <input type="text"/> | <input type="text"/> : <input type="text"/> : <input type="text"/> | <input type="text"/> | <input type="checkbox"/>                             | <input type="checkbox"/> | <input type="text"/> : <input type="text"/> : <input type="text"/> | <input type="checkbox"/> |
| 1st ROSC                          | <input type="text"/>        | <input type="text"/> : <input type="text"/> : <input type="text"/> | <input type="text"/> : <input type="text"/> : <input type="text"/> | <input type="text"/> | <input type="checkbox"/>                             | <input type="checkbox"/> | <input type="text"/> : <input type="text"/> : <input type="text"/> | <input type="checkbox"/> |
| Resus. stopped due to death       | <input type="text"/>        | <input type="text"/> : <input type="text"/> : <input type="text"/> | <input type="text"/> : <input type="text"/> : <input type="text"/> | <input type="text"/> | <input type="checkbox"/>                             | <input type="checkbox"/> | <input type="text"/> : <input type="text"/> : <input type="text"/> | <input type="checkbox"/> |
| Patient transported from scene    | <input type="text"/>        | <input type="text"/> : <input type="text"/> : <input type="text"/> | <input type="text"/> : <input type="text"/> : <input type="text"/> | <input type="text"/> | <input type="checkbox"/>                             | <input type="checkbox"/> | <input type="text"/> : <input type="text"/> : <input type="text"/> | <input type="checkbox"/> |
| Transferred to aero-medical       | <input type="text"/>        | <input type="text"/> : <input type="text"/> : <input type="text"/> | <input type="text"/> : <input type="text"/> : <input type="text"/> | <input type="text"/> | <input type="checkbox"/>                             | <input type="checkbox"/> | <input type="text"/> : <input type="text"/> : <input type="text"/> | <input type="checkbox"/> |
| ED or EMS destination arrival     | <input type="text"/>        | <input type="text"/> : <input type="text"/> : <input type="text"/> | <input type="text"/> : <input type="text"/> : <input type="text"/> | <input type="text"/> | <input type="checkbox"/>                             | <input type="checkbox"/> | <input type="text"/> : <input type="text"/> : <input type="text"/> | <input type="checkbox"/> |

Sort Event Order   Align Times   Turn Align Off   Original Order   Reset Form

Person responsible for data on this form:

Note: Time Intervals will be computed at data entry time

Complete this form:  
 - for each trauma episode  
 Main data source: PCR  
 Other data source: Dispatch, family members, witnesses

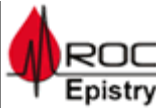

# Pre-hospital Time Record

Trauma

Version 2.00.00; Date: 11/13/2006

Page 1 of 1

## Episode Information:

Date (mm/dd/yyyy)  
 /  /

Time call received at dispatch  
 :  :  (hh:mm:ss; 24hr clock)

From PCR/other    From dispatch    Unable to obtain (Non-ROC agency 1<sup>st</sup> arrival)

CTC Episode ID:  
 -  -

Incident Number (optional)

Site Linking ID (optional)

## Time Record:

-Fill in Event Order, Watch time, and/or Dispatch time for all events that occurred. If an event did not occur, enter "0" for Event Order.  
 -If no documented time exists (from Watch or Dispatch) for an event that occurred, fill in event order, leave the time fields blank and check the "No Doc Time" box. The exception is "911 call received at primary PSAP" (enter the event order as "0" if you do not know the time).

### -Additional Instructions/Documentation

| Event                             | Event Order<br>1-16<br>0=NA | Time of Event                                                      |                                                                    | No Doc Time              | Computer to generate<br>(you may adjust)                           |                          |
|-----------------------------------|-----------------------------|--------------------------------------------------------------------|--------------------------------------------------------------------|--------------------------|--------------------------------------------------------------------|--------------------------|
|                                   |                             | Watch<br>hh:mm:ss                                                  | Dispatch<br>hh:mm:ss                                               |                          | Aligned Time<br>hh:mm:ss                                           | Adj                      |
| 911 call received at primary PSAP | <input type="text"/>        | <input type="text"/> : <input type="text"/> : <input type="text"/> | <input type="text"/> : <input type="text"/> : <input type="text"/> | <input type="checkbox"/> | <input type="text"/> : <input type="text"/> : <input type="text"/> | <input type="checkbox"/> |
| 1st 911 call received at dispatch | <input type="text"/>        | <input type="text"/> : <input type="text"/> : <input type="text"/> | <input type="text"/> : <input type="text"/> : <input type="text"/> | <input type="checkbox"/> | <input type="text"/> : <input type="text"/> : <input type="text"/> | <input type="checkbox"/> |
| 1st vehicle dispatch time         | <input type="text"/>        | <input type="text"/> : <input type="text"/> : <input type="text"/> | <input type="text"/> : <input type="text"/> : <input type="text"/> | <input type="checkbox"/> | <input type="text"/> : <input type="text"/> : <input type="text"/> | <input type="checkbox"/> |
| 1st vehicle arrival at scene      | <input type="text"/>        | <input type="text"/> : <input type="text"/> : <input type="text"/> | <input type="text"/> : <input type="text"/> : <input type="text"/> | <input type="checkbox"/> | <input type="text"/> : <input type="text"/> : <input type="text"/> | <input type="checkbox"/> |
| 1st ALS arrival at scene          | <input type="text"/>        | <input type="text"/> : <input type="text"/> : <input type="text"/> | <input type="text"/> : <input type="text"/> : <input type="text"/> | <input type="checkbox"/> | <input type="text"/> : <input type="text"/> : <input type="text"/> | <input type="checkbox"/> |
| Resus. stopped due to death       | <input type="text"/>        | <input type="text"/> : <input type="text"/> : <input type="text"/> | <input type="text"/> : <input type="text"/> : <input type="text"/> | <input type="checkbox"/> | <input type="text"/> : <input type="text"/> : <input type="text"/> | <input type="checkbox"/> |
| Patient transported from scene    | <input type="text"/>        | <input type="text"/> : <input type="text"/> : <input type="text"/> | <input type="text"/> : <input type="text"/> : <input type="text"/> | <input type="checkbox"/> | <input type="text"/> : <input type="text"/> : <input type="text"/> | <input type="checkbox"/> |
| Transferred to aero-medical       | <input type="text"/>        | <input type="text"/> : <input type="text"/> : <input type="text"/> | <input type="text"/> : <input type="text"/> : <input type="text"/> | <input type="checkbox"/> | <input type="text"/> : <input type="text"/> : <input type="text"/> | <input type="checkbox"/> |
| ED or EMS destination arrival     | <input type="text"/>        | <input type="text"/> : <input type="text"/> : <input type="text"/> | <input type="text"/> : <input type="text"/> : <input type="text"/> | <input type="checkbox"/> | <input type="text"/> : <input type="text"/> : <input type="text"/> | <input type="checkbox"/> |

Sort Event Order   Align Times   Turn Align Off   Original Order   Reset Form

Person responsible for data on this form:

Note: Time Intervals will be computed at data entry time

**Episode Information:**

**Date** (mm/dd/yyyy)

 /  / 

**Time call received at dispatch**

 :  :  (hh:mm:ss; 24hr clock)

- From PCR/other    From dispatch    Unable to obtain (Non-ROC agency 1<sup>st</sup> arrival)

**CTC Episode ID:**

 -  - 

**Incident Number** (optional)

**Site Linking ID** (optional)

**1. Location of Episode:**

**a. Location** (check one only)

- Census tract:  
US: State  County  Tract  Link <http://www.ffiec.gov/geocode/default.htm>  
Toronto: CTName/CTUID  (nnnn.nn/nnnnnnn.nn)
- Lat/long:  
Latitude  →  Decimal degrees    DMS    DM  
Longitude  →  Decimal degrees    DMS    DM  
Datum →  NAD83    NAD27    WGS84
- UTM:  
Easting  →  Meters    Kilometers  
Northing  →  Meters    Kilometers  
Zone

- Unknown/not noted

**b. Public or non-public?**

- Public (check one only)  
 Street/highway  
 Public building (schools, government office)  
 Place of recreation (park, stadium, lake)  
 Industrial place (factory, warehouse, construction site)  
 Other public property (sidewalk, store, church, restaurant, bar, hotel)
- Non public (check one only)  
 Home residence (inside or immediately surrounding)  
 Farm/ranch  
 Healthcare facility  
 Residential institution (assisted living, nursing home)  
 Other private

**2. Demographics:**

**a. Age:**

  years    months    days

- Calculated from DOB  
 Estimated by EMS

**If no age available use categories:**

- Infant (If < 1 year)  
 Child (1 - 11 years)  
 Adolescent (12 - 19 years)  
 Adult (20 - 39 years)  
 Middle age (40 - 60 years)  
 Older (61 - 75 years)  
 Elderly (> 75 years)  
 Unknown/not noted

**b. Gender:**

- Male    Female    Unknown/not noted

**c. Race/Ethnicity:** (check all that apply)

- Hispanic or Latino  
 White  
 African-American/Black  
 American-Indian/Alaska Native  
 Asian  
 Native Hawaiian/Pacific Islander  
 Other  
 Unknown/not noted

**Episode Information:**

Date (mm/dd/yyyy)

/  /

Time call received at dispatch

:  :  (hh:mm:ss; 24hr clock)

- From PCR/other  
  From dispatch  
  Unable to obtain (Non-ROC agency 1<sup>st</sup> arrival)

CTC Episode ID:

-  -

Incident Number (optional)

Site Linking ID (optional)

**3. Prehospital intervention:**

- No EMS Prehospital interventions from the list below were recorded

NA/NR   Done

- Airway, bag-mask  
  Airway, advanced → Check all attempted/used:  
      Combitube/LMA/EOA (or other supraglottic airway)  
      Oral ET  
      Nasal ET  
      Cricothyrotomy  
      CPAP  
      Ventilator  
      RSI  
  
  CPR  
  Hemorrhage control  
  Hypothermia therapy → Method (optional) (check all)    External    Internal  
  IV/IO line → Check all attempted:    IO    Initiation and/or continuation of an IV  
     Was fluid given? (check one only)  
      No  
      Unknown/not noted  
      TKO (to keep open)  
      Yes → (Check all given)  

| <u>Fluid type</u>                          | <u>Total volume infused (optional)</u> |
|--------------------------------------------|----------------------------------------|
| <input type="checkbox"/> D5W               | <input type="text"/> mls               |
| <input type="checkbox"/> Normal Saline     | <input type="text"/> mls               |
| <input type="checkbox"/> Lactated Ringers  | <input type="text"/> mls               |
| <input type="checkbox"/> Other             | <input type="text"/> mls               |
| <input type="checkbox"/> Unknown/not noted |                                        |
- Monitor, advanced → Check all attempted:    12-lead    EtCO<sub>2</sub>    Pacing

**4. Disposition: (check one only)**

- Died at scene or en route  
 Treated by EMS:  
     Why was treatment halted? (check one)  
      Considered futile    DNR (written or verbal)    Obviously dead  
 Not treated by EMS:  
     Why? (check one)  
      Considered futile    DNR (written or verbal)    Obviously dead  
 Transported by EMS to ED/hospital with ROSC or ongoing resuscitation → Complete the **ED hospital** form  
     Transported method:    By land    By air  
     Patient status at ED arrival:    ROSC present    Ongoing resuscitation    Unknown/not noted  
 Alive and not transported by EMS to ED/hospital

continue to next page

**Episode Information:**
**Date** (mm/dd/yyyy)

 /  / 
**Time call received at dispatch**
 :  :  (hh:mm:ss; 24hr clock)

- 
- From PCR/other
- 
- From dispatch
- 
- Unable to obtain (Non-ROC agency 1
- <sup>st</sup>
- arrival)

**CTC Episode ID:**
 -  - 
**Incident Number** (optional)

**Site Linking ID** (optional)

**Cardiac Only Section:**
**C1. Cardiac Arrest occurred:**

- 
- After EMS (includes fire) arrival/witnessed by EMS → skip to
- item C3**
- 
- 
- Before EMS arrival
- Witnessed (seen or heard) by someone other than EMS personnel
  - Not witnessed (seen or heard)
  - Unknown/not noted

**C2. EMS Chest Compressions:**

- 
- Yes, method (check all that apply) →
- 
- Manual
- 
- Mechanical
- 
- 
- No EMS Chest Compressions
- 
- 
- Unknown/not noted

**C3. Was resuscitation attempted by bystanders prior to EMS arrival?**

- 
- Unknown/not noted
- 
- 
- No
- 
- 
- Yes → Was CPR attempted?
- 
- Yes
- 
- No
- 
- Was AED/Defib applied?
- 
- 
- No
- 
- 
- Yes → Were shocks delivered?
- 
- Yes
- 
- No
- 
- Unknown/not noted
- 
- AED/Defib applied by:
- 
- Lay person
- 
- Police
- 
- Healthcare
- 
- Other
- 
- Unknown/not noted

**C4. Drug therapies noted:**

| Drug Given                                                             |                                    | Total Dose               | Route (check all attempted) |                          |                          |                          |
|------------------------------------------------------------------------|------------------------------------|--------------------------|-----------------------------|--------------------------|--------------------------|--------------------------|
| NA/NR                                                                  | Yes Name                           |                          | IV                          | ETT                      | IO                       | Drip                     |
| <b>I. Required:</b>                                                    |                                    |                          |                             |                          |                          |                          |
| <input type="radio"/>                                                  | <input type="radio"/> Epinephrine  | <input type="text"/> mg  | <input type="checkbox"/>    | <input type="checkbox"/> | <input type="checkbox"/> | <input type="checkbox"/> |
| <b>II. Total dose/route are optional for the following:</b>            |                                    |                          |                             |                          |                          |                          |
| <input type="radio"/>                                                  | <input type="radio"/> Amiodarone   | <input type="text"/> mg  | <input type="checkbox"/>    | <input type="checkbox"/> | <input type="checkbox"/> | <input type="checkbox"/> |
| <input type="radio"/>                                                  | <input type="radio"/> Atropine     | <input type="text"/> mg  | <input type="checkbox"/>    | <input type="checkbox"/> | <input type="checkbox"/> | <input type="checkbox"/> |
| <input type="radio"/>                                                  | <input type="radio"/> Bicarb       | <input type="text"/> mEq | <input type="checkbox"/>    | <input type="checkbox"/> | <input type="checkbox"/> | <input type="checkbox"/> |
| <input type="radio"/>                                                  | <input type="radio"/> Lidocaine    | <input type="text"/> mg  | <input type="checkbox"/>    | <input type="checkbox"/> | <input type="checkbox"/> | <input type="checkbox"/> |
| <b>III. Drug name/total dose/route are optional for the following:</b> |                                    |                          |                             |                          |                          |                          |
| <input type="radio"/>                                                  | <input type="radio"/> Calcium      | <input type="text"/> mg  | <input type="checkbox"/>    | <input type="checkbox"/> | <input type="checkbox"/> | <input type="checkbox"/> |
| <input type="radio"/>                                                  | <input type="radio"/> Dextrose     | <input type="text"/> g   | <input type="checkbox"/>    | <input type="checkbox"/> | <input type="checkbox"/> | <input type="checkbox"/> |
| <input type="radio"/>                                                  | <input type="radio"/> Magnesium    | <input type="text"/> mg  | <input type="checkbox"/>    | <input type="checkbox"/> | <input type="checkbox"/> | <input type="checkbox"/> |
| <input type="radio"/>                                                  | <input type="radio"/> Naloxone     | <input type="text"/> mg  | <input type="checkbox"/>    | <input type="checkbox"/> | <input type="checkbox"/> | <input type="checkbox"/> |
| <input type="radio"/>                                                  | <input type="radio"/> Procainamide | <input type="text"/> mg  | <input type="checkbox"/>    | <input type="checkbox"/> | <input type="checkbox"/> | <input type="checkbox"/> |
| <input type="radio"/>                                                  | <input type="radio"/> Vasopressin  | <input type="text"/> IU  | <input type="checkbox"/>    | <input type="checkbox"/> | <input type="checkbox"/> | <input type="checkbox"/> |
| <b>IV. Drug class given are optional for the following:</b>            |                                    |                          |                             |                          |                          |                          |
| <input type="radio"/>                                                  | <input type="radio"/> Inotropes    |                          |                             |                          |                          |                          |
| <input type="radio"/>                                                  | <input type="radio"/> Paralytics   |                          |                             |                          |                          |                          |

continue to next page

**Episode Information:**

Date (mm/dd/yyyy)

/  /

Time call received at dispatch

:  :  (hh:mm:ss; 24hr clock)

- From PCR/other   
  From dispatch   
  Unable to obtain (Non-ROC agency 1<sup>st</sup> arrival)

CTC Episode ID:

-  -

Incident Number (optional)

Site Linking ID (optional)

**C5. Etiology of arrest: Field Classification (from field data) (required)**

- No field classification  
 No obvious cause identified (includes NEMSIS 2250 presumed cardiac) } *Do Not complete Column A below*  
 Obvious cause → (check one cause in **column A** below)

**C6. Etiology of arrest: Site Classification (from field data) (required)**

- No obvious cause identified (includes NEMSIS 2250 presumed cardiac) → *Do Not complete Column B below*  
 Obvious cause → (check one cause in **column B** below)

| Obvious Cause                                                                               | A<br>Field<br>Classification | B<br>Site<br>Classification |
|---------------------------------------------------------------------------------------------|------------------------------|-----------------------------|
| Anaphylaxis                                                                                 | <input type="radio"/>        | <input type="radio"/>       |
| Chemical poisoning<br>(intentional or unintentional, includes carbon monoxide, toxic gases) | <input type="radio"/>        | <input type="radio"/>       |
| Drowning                                                                                    | <input type="radio"/>        | <input type="radio"/>       |
| Drug poisoning<br>(intentional or unintentional, includes alcohol)                          | <input type="radio"/>        | <input type="radio"/>       |
| Electrocution<br>(non-lightning)                                                            | <input type="radio"/>        | <input type="radio"/>       |
| Excessive cold                                                                              | <input type="radio"/>        | <input type="radio"/>       |
| Excessive heat                                                                              | <input type="radio"/>        | <input type="radio"/>       |
| Foreign body obstruction                                                                    | <input type="radio"/>        | <input type="radio"/>       |
| Hanging                                                                                     | <input type="radio"/>        | <input type="radio"/>       |
| Lightning                                                                                   | <input type="radio"/>        | <input type="radio"/>       |
| Mechanical suffocation                                                                      | <input type="radio"/>        | <input type="radio"/>       |
| Non-traumatic exsanguination                                                                | <input type="radio"/>        | <input type="radio"/>       |
| Radiation exposure                                                                          | <input type="radio"/>        | <input type="radio"/>       |
| Respiratory                                                                                 | <input type="radio"/>        | <input type="radio"/>       |
| SIDS<br>(sudden infant death syndrome)                                                      | <input type="radio"/>        | <input type="radio"/>       |
| Smoke inhalation                                                                            | <input type="radio"/>        | <input type="radio"/>       |
| Strangulation                                                                               | <input type="radio"/>        | <input type="radio"/>       |
| Terminal illness<br>(includes end-stage diseases such as cancer)                            | <input type="radio"/>        | <input type="radio"/>       |
| Trauma<br>(includes blunt, penetrating or burns)                                            | <input type="radio"/>        | <input type="radio"/>       |
| Venomous stings                                                                             | <input type="radio"/>        | <input type="radio"/>       |
| Other obvious cause *                                                                       | <input type="radio"/>        | <input type="radio"/>       |
| * Other cause (A - Field classification):                                                   | <input type="text"/>         | (60)                        |
| * Other cause (B - Site classification):                                                    | <input type="text"/>         | (60)                        |

continue to next page



**Episode Information:****Date** (mm/dd/yyyy) /  / **Time call received at dispatch** :  :  (hh:mm:ss; 24hr clock)

- From PCR/other    From dispatch    Unable to obtain (Non-ROC agency 1<sup>st</sup> arrival)

**CTC Episode ID:** -  - **Incident Number** (optional)**Site Linking ID** (optional)**C7. Were there contributing factors directly related to this cardiac arrest?**

(from field data — data guardian abstraction) (required)

See Manual of Operations for expanded definitions

- None noted
- Yes (check all that apply)
- Anaphylaxis
  - Chemical poisoning (intentional or unintentional, includes carbon monoxide and toxic gases)
  - Dialysis
  - Drowning
  - Drug poisoning (intentional or unintentional, includes alcohol)
  - Electrocutation (non-lightning)
  - Excessive cold
  - Excessive heat
  - Foreign body obstruction
  - Hanging
  - Lightning
  - Mechanical suffocation
  - Non-traumatic exsanguination
  - Radiation exposure
  - Respiratory
  - SIDS (sudden infant death syndrome)
  - Smoke inhalation
  - Strangulation
  - Terminal illness (includes end-stage diseases such as cancer)
  - Trauma (includes blunt, penetrating or burns)
  - Venomous stings
  - Other contributing factors, specify:  
 (60)

**C8. Evidence of implantable cardioverter defibrillator:** (optional)

- Yes  
 No

continue to next page

**Episode Information:****Date** (mm/dd/yyyy) /  / **Time call received at dispatch** :  :  (hh:mm:ss; 24hr clock) From PCR/other  From dispatch  Unable to obtain (Non-ROC agency 1<sup>st</sup> arrival)**CTC Episode ID:** -  - **Incident Number** (optional)**Site Linking ID** (optional)**Trauma Only Section:****T1. Vital signs:****First Recorded Set**Patient in traumatic arrest or VSA?  Yes  NoNA/NRDone  GCS: Eye  Verbal  Motor  or Total GCS Indicate if: → Advanced airway?  Yes  NoIndicate if: → Chemically paralyzed or sedated?  Yes  No  SBP:  / DBP(optional)   SBP Not Detectable  Pulse:   Resp:   SpO<sub>2</sub>  → Supplemental oxygen?  Yes  NoIndicate if more than one set vital signs recorded?  Yes  No (If No, skip to **item T2**)**Second Recorded Set**Patient in traumatic arrest or VSA?  Yes  NoNA/NRDone  GCS: Eye  Verbal  Motor  or Total GCS Indicate if: → Advanced airway?  Yes  NoIndicate if: → Chemically paralyzed or sedated?  Yes  No  SBP:  / DBP(optional)   SBP Not Detectable  Pulse:   Resp:   SpO<sub>2</sub>  → Supplemental oxygen?  Yes  No**Worst Recorded**Patient in traumatic arrest or VSA for all recorded sets?  Yes  NoNA/NRDone  GCS: Eye  Verbal  Motor  or Total GCS Indicate if: → Advanced airway?  Yes  NoIndicate if: → Chemically paralyzed or sedated?  Yes  No  Lowest SBP:  / DBP(optional)   SBP Not Detectable  Lowest Pulse:   Highest Pulse:   Lowest Resp:   Highest Resp:   SpO<sub>2</sub>  → Supplemental oxygen?  Yes  No

continue to next page

**Episode Information:****Date** (mm/dd/yyyy) /  / **Time call received at dispatch** :  :  (hh:mm:ss; 24hr clock)

- From PCR/other    From dispatch    Unable to obtain (Non-ROC agency 1<sup>st</sup> arrival)

**CTC Episode ID:** -  - **Incident Number** (optional)**Site Linking ID** (optional)**T2. Injury characteristics****a. Type of injury:** (check one)

- Blunt  
 Penetrating  
 Burn  
 Not known  
 Other  (30)

**b. Mechanism of injury:** (check one)

- Motor vehicle occupant  
 Motorcyclist  
 Pedal cyclist  
 Pedestrian (struck by or against vehicle)  
 Other transport (includes off road vehicle crash, motor vehicle non-traffic accident)  
 Fall  
 Struck by/against or crushed (includes unarmed fight, rape, child battery, strike by blunt/thrown object)  
 Cut/pierce stab  
 Fire/burn (includes smoke inhalation)  
 Machinery  
 Firearm gunshot (includes BB/pellet gunshot, accidental assault, or self-inflicted)  
 Natural/environmental (includes dog bite, other bite/sting, overexertion)  
 Not known  
 Other (includes foreign body, poisoning, radiation exposure, aircraft related accident, water transport)  
Specify:  (30)

**T3. Safety equipment:** (check all that apply)

- Restraint use  
 Air bag deployment  
 Helmet  
 None  
 Unknown  
 Not applicable  
 Other:  (30)

**Person responsible for data on this form:**

**Episode Information:**

**Date** (mm/dd/yyyy)  
[ ] / [ ] / [ ]

**Time call received at dispatch**  
[ ] : [ ] : [ ] (hh:mm:ss; 24hr clock)

From PCR/other    From dispatch    Unable to obtain (Non-ROC agency 1<sup>st</sup> arrival)

**CTC Episode ID:**  
[ ] - [ ] - [ ]

**Incident Number** (optional)  
[ ]

**Site Linking ID** (optional)  
[ ]

**Mandatory ED/hospital Information:**

1. **Name of ED/hospital transported to:** [ ] ▼

|                               |
|-------------------------------|
| Cath Lab: [ ] (Auto fill)     |
| EP Lab: [ ] (Auto fill)       |
| Trauma level: [ ] (Auto fill) |

2. **Date/time of ED arrival/hospital admit:**

Date: [ ] / [ ] / [ ] (mm/dd/yyyy)

Time: (optional) [ ] : [ ] 24hr clock (hh:mm)

3. **Was patient transferred to another acute care hospital:**

- No  
 Yes → Complete below box

| Name of next acute hospital | Date of transfer (mm/dd/yyyy) |
|-----------------------------|-------------------------------|
| [ ] ▼                       | [ ] / [ ] / [ ]               |
| [ ] ▼                       | [ ] / [ ] / [ ]               |
| [ ] ▼                       | [ ] / [ ] / [ ]               |
| [ ] ▼                       | [ ] / [ ] / [ ]               |
| [ ] ▼                       | [ ] / [ ] / [ ]               |

4. **Date/time of final ED/hospital discharge, reclassification, or death:**

Date: [ ] / [ ] / [ ] (mm/dd/yyyy)

Time: (optional) [ ] : [ ] 24hr clock (hh:mm)

5. **Final vital status:** (note: death location/discharge location are optional)

- Dead →  Died in first ED/Hospital → Specify (optional):  ED    Hospital  
 Died after transfer to another hospital
- Alive →  Discharged from first ED/Hospital → Specify (optional):  ED    Hospital  
 Discharged after transfer(s) to a final hospital providing acute care  
 Remains in acute care hospital, reclassified as a non-acute patient awaiting placement or chronic care

**Episode Information:**
**Date (mm/dd/yyyy)**
 /  / 
**Time call received at dispatch**
 :  :  (hh:mm:ss; 24hr clock)

- 
- From PCR/other
- 
- From dispatch
- 
- Unable to obtain (Non-ROC agency 1
- <sup>st</sup>
- arrival)

**CTC Episode ID:**
 -  - 
**Incident Number (optional)**

**Site Linking ID (optional)**

**Optional ED/hospital Information (throughout remainder of form):**
**6. Trauma Registry:**

- 
- No
- 
- 
- Yes → Registry ID:
- 
- (optional)

**7. Cardiac Registry (e.g. ICD Registry, Cath/PCI Registry):**

- 
- No
- 
- 
- Yes → Registry ID:
- 
- (optional)
- 
- Name of registry:
- 
- (optional)

**8. Residential status at final vital status:**

- 
- Home →
- 
- Independent
- 
- With assistance
- 
- Unknown/not noted
- 
- 
- Rehabilitation
- 
- 
- Assisted living
- 
- 
- Nursing home
- 
- 
- Remain in acute care hospital, reclassified as non-acute patient awaiting placement or chronic care
- 
- 
- Dead at discharge

**9. First recorded vital signs in ED/hospital:**

- 
- NA/NR
- 
- 
- Done → SBP:
- 
- / DBP
- 
- Time obtained
- 
- :
- 
- 24hr clock (hh:mm)
- 
- Pulse:
- 
- 
- Respiration:
- 

 Indicate if: → Advanced airway?  Yes     No  
 → Chemically paralyzed or sedated?  Yes     No

 → Temperature:  → Unit  C     F

 Indicate if: → Source  Rectal     Axillary     Oral     Tympanic     Core

 → GCS: E  V  M  or Total GCS 

 Indicate if: → Advanced airway?  Yes     No  
 → Chemically paralyzed or sedated?  Yes     No

**10. First ED/hospital labs:**

| NA/NR                 | Done                  | Labs                      | Value/Units                                                                                                                                                                 | Date (mm/dd/yyyy)                                                  | Time 24hr clock (hh:mm)                     |
|-----------------------|-----------------------|---------------------------|-----------------------------------------------------------------------------------------------------------------------------------------------------------------------------|--------------------------------------------------------------------|---------------------------------------------|
| <input type="radio"/> | <input type="radio"/> | Blood glucose:            | <input type="text"/> <input type="radio"/> mg/dL <input type="radio"/> mmol/L                                                                                               | <input type="text"/> / <input type="text"/> / <input type="text"/> | <input type="text"/> : <input type="text"/> |
| <input type="radio"/> | <input type="radio"/> | Ethanol level:            | <input type="text"/> mg%                                                                                                                                                    | <input type="text"/> / <input type="text"/> / <input type="text"/> | <input type="text"/> : <input type="text"/> |
| <input type="radio"/> | <input type="radio"/> | Hematocrit:               | <input type="text"/> %                                                                                                                                                      | <input type="text"/> / <input type="text"/> / <input type="text"/> | <input type="text"/> : <input type="text"/> |
| <input type="radio"/> | <input type="radio"/> | Hemoglobin:               | <input type="text"/> <input type="radio"/> g/dL <input type="radio"/> g/L                                                                                                   | <input type="text"/> / <input type="text"/> / <input type="text"/> | <input type="text"/> : <input type="text"/> |
| <input type="radio"/> | <input type="radio"/> | SaO <sub>2</sub> :        | <input type="text"/>                                                                                                                                                        |                                                                    |                                             |
|                       |                       | <u>Arterial blood gas</u> |                                                                                                                                                                             | <input type="text"/> / <input type="text"/> / <input type="text"/> | <input type="text"/> : <input type="text"/> |
| <input type="radio"/> | <input type="radio"/> | pH:                       | <input type="text"/>                                                                                                                                                        |                                                                    |                                             |
| <input type="radio"/> | <input type="radio"/> | pCO <sub>2</sub> :        | <input type="text"/>                                                                                                                                                        |                                                                    |                                             |
| <input type="radio"/> | <input type="radio"/> | paO <sub>2</sub> :        | <input type="text"/> <input type="radio"/> Advanced airway <input type="text"/> % FiO <sub>2</sub> <input type="radio"/> Nasal cannula/face mask <input type="text"/> L/min |                                                                    |                                             |

**Episode Information:****Date** (mm/dd/yyyy) /  / **Time call received at dispatch** :  :  (hh:mm:ss; 24hr clock)

- From PCR/other    From dispatch    Unable to obtain (Non-ROC agency 1<sup>st</sup> arrival)

**CTC Episode ID:** -  - **Incident Number** (optional)**Site Linking ID** (optional)**11. Demographics:****a. Age:**  years    months    days**b. Race:** (check all that apply)

- American-Indian/Alaska Native  
 Asian  
 Black/African-American  
 Native Hawaiian/Pacific Islander  
 White  
 Unknown/not noted

**c. Ethnicity:** (check one only)

- Hispanic or Latino  
 Not hispanic or Latino  
 Unknown/not noted

**12. Residential status prior to event:**

- Home →  Independent    With assistance    Unknown/not noted  
 Rehabilitation  
 Assisted living  
 Nursing home  
 Unknown/not noted

**13. Location of residence prior to event:** (check one) Census tract:US: State  County  Tract Link <http://www.ffiec.gov/geocode/default.htm>Toronto: CTName/CTUID  (nnnn.nn/nnnnnnn.nn) Lat/long:Latitude  →  Decimal degrees    DMS    DMLongitude  →  Decimal degrees    DMS    DMDatum →  NAD83    NAD27    WGS84 UTM:Easting  →  Meters    KilometersNorthing  →  Meters    KilometersZone  Unknown/not noted**14. Total days in the ICU/CCU:** Number of days in hospital  (prefill)**15. Was patient made DNR or care limited or withdrawn while in the ED/hospital?**

- Yes  
 No

**Episode Information:**
**Date (mm/dd/yyyy)**
 /  / 
**Time call received at dispatch**
 :  :  (hh:mm:ss; 24hr clock)

 From PCR/other   
  From dispatch   
  Unable to obtain (Non-ROC agency 1<sup>st</sup> arrival)

**CTC Episode ID:**
 -  - 
**Incident Number (optional)**

**Site Linking ID (optional)**

**16. Major Procedure codes OR Procedure Types while in ED and/or hospital:**

Provide up to 15 ICD-9/ICD-10 procedure codes OR provide Procedure Types (below table)

 No major procedures noted

| ICD-9 or ICD-10 Procedure codes (List up to 15)                                            |                          |                          |
|--------------------------------------------------------------------------------------------|--------------------------|--------------------------|
| Indicate ICD version used: <input type="radio"/> ICD-9-CM <input type="radio"/> ICD-10-PCS |                          |                          |
| 1. <input type="text"/>                                                                    | 2. <input type="text"/>  | 3. <input type="text"/>  |
| 4. <input type="text"/>                                                                    | 5. <input type="text"/>  | 6. <input type="text"/>  |
| 7. <input type="text"/>                                                                    | 8. <input type="text"/>  | 9. <input type="text"/>  |
| 10. <input type="text"/>                                                                   | 11. <input type="text"/> | 12. <input type="text"/> |
| 13. <input type="text"/>                                                                   | 14. <input type="text"/> | 15. <input type="text"/> |

**Procedure types (check all that apply)**

| Cardiac arrest patients                                                                                                                                                                                                                                                                                                                                                                                                                                                                                                                                                               | Trauma patients                                                                                                                                                                                                                                                                                                                                                                                                                                                                                                                |
|---------------------------------------------------------------------------------------------------------------------------------------------------------------------------------------------------------------------------------------------------------------------------------------------------------------------------------------------------------------------------------------------------------------------------------------------------------------------------------------------------------------------------------------------------------------------------------------|--------------------------------------------------------------------------------------------------------------------------------------------------------------------------------------------------------------------------------------------------------------------------------------------------------------------------------------------------------------------------------------------------------------------------------------------------------------------------------------------------------------------------------|
| <input type="checkbox"/> CPR<br><input type="checkbox"/> Fibrinolytic<br><input type="checkbox"/> Hypothermia therapy<br>Duration: <input type="text"/> (hours)<br>Method (check all): <input type="checkbox"/> External <input type="checkbox"/> Internal<br><input type="checkbox"/> Cath, diagnostic<br><input type="checkbox"/> Cath, interventional<br><input type="checkbox"/> CABG<br><input type="checkbox"/> Pacemaker implant<br><input type="checkbox"/> ICD implant → <input type="radio"/> Biv <input type="radio"/> Other<br><input type="checkbox"/> None of the above | <input type="checkbox"/> Abdominal surgery<br><input type="checkbox"/> Thoracic surgery<br><input type="checkbox"/> Neurosurgery<br><input type="checkbox"/> Vascular surgery<br><input type="checkbox"/> Interventional angiography<br><input type="checkbox"/> Major orthopedic<br><input type="checkbox"/> Neck surgery<br><input type="checkbox"/> Airway management<br><input type="checkbox"/> Blood transfusion<br># units 1 <sup>st</sup> 24 hours: <input type="text"/><br><input type="checkbox"/> None of the above |

**17. Optional Patient Identification Information: (for site use only-not transmitted to, or stored at, CTC)**

 First Name: 

 Last Name: 

 DOB:  /  /  (mm/dd/yyyy)

 Social Security # (US): 

 Health Care # (Canada): 

continue to next page

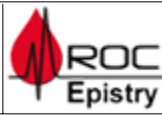

Episode Information:

Date (mm/dd/yyyy)

□ / □ / □

Time call received at dispatch

□ : □ : □ (hh:mm:ss; 24hr clock)

From PCR/other  From dispatch  Unable to obtain (Non-ROC agency 1<sup>st</sup> arrival)

CTC Episode ID:

□ - □ - □

Incident Number (optional)

□

Site Linking ID (optional)

□

Trauma Only Section: (items #T1-T3)

T1. Anatomic Injuries:

(List the Abbreviated Injury Score for the 3 worst injuries in each anatomic region; if no injury, enter "0" to left of decimal point)

|            |          |          |          |
|------------|----------|----------|----------|
| Head/Neck: | 1. □ . □ | 2. □ . □ | 3. □ . □ |
| Face:      | 1. □ . □ | 2. □ . □ | 3. □ . □ |
| Chest:     | 1. □ . □ | 2. □ . □ | 3. □ . □ |
| Abdomen:   | 1. □ . □ | 2. □ . □ | 3. □ . □ |
| Extremity: | 1. □ . □ | 2. □ . □ | 3. □ . □ |
| External:  | 1. □ . □ | 2. □ . □ | 3. □ . □ |

Was AIS data based on autopsy results?  Yes  No

T2. Trauma Scores:

|                   |   |                 |   |
|-------------------|---|-----------------|---|
| Calculated ISS:   | □ | Provided ISS:   | □ |
| Calculated RTS:   | □ | Provided RTS:   | □ |
| Calculated TRISS: | □ | Provided TRISS: | □ |

T3. Diagnosis codes while in ED/hospital (in order to calculate an ICISS)

Provide up to 15 ICD-9/ICD-10 diagnosis codes

|                                                                                            |       |       |
|--------------------------------------------------------------------------------------------|-------|-------|
| ICD-9 or ICD-10 Diagnosis codes (List up to 15)                                            |       |       |
| Indicate ICD version used: <input type="radio"/> ICD-9-CM <input type="radio"/> ICD-10-PCS |       |       |
| 1. □                                                                                       | 2. □  | 3. □  |
| 4. □                                                                                       | 5. □  | 6. □  |
| 7. □                                                                                       | 8. □  | 9. □  |
| 10. □                                                                                      | 11. □ | 12. □ |
| 13. □                                                                                      | 14. □ | 15. □ |

continue to next page



**Episode Information:****Date** (mm/dd/yyyy) /  / **Time call received at dispatch** :  :  (hh:mm:ss; 24hr clock)

- From PCR/other    From dispatch    Unable to obtain (Non-ROC agency 1<sup>st</sup> arrival)

**CTC Episode ID:** -  - **Incident Number** (optional)**Site Linking ID** (optional)**For Cardiac patients only: (items #C1-C4)****C1. Etiology of Arrest:****Data Guardian Classification** (based on all available information including ED/hospital records/notes and public records)

- No obvious cause identified (Utstein "presumed cardiac")
- Obvious cause (check one)
- Anaphylaxis
  - Chemical poisoning (intentional or unintentional, includes carbon monoxide and toxic gases)
  - Drowning
  - Drug poisoning (intentional or unintentional, includes alcohol)
  - Electrocution (non-lightning)
  - Excessive cold
  - Excessive heat
  - Foreign body obstruction
  - Hanging
  - Lightning
  - Mechanical suffocation
  - Non-traumatic exsanguination
  - Radiation exposure
  - Respiratory
  - SIDS (sudden infant death syndrome)
  - Smoke inhalation
  - Strangulation
  - Terminal illness (includes end-stage diseases such as cancer)
  - Trauma (includes blunt, penetrating or burns)
  - Venomous stings
  - Other contributing factors, specify:

 (60)

continue to next page

**Episode Information:****Date** (mm/dd/yyyy) /  / **Time call received at dispatch** :  :  (hh:mm:ss; 24hr clock)

- From PCR/other     From dispatch     Unable to obtain (Non-ROC agency 1<sup>st</sup> arrival)

**CTC Episode ID:** -  - **Incident Number** (optional)**Site Linking ID** (optional)**C2. Were there contributing factors directly related to this cardiac arrest?**

(based on all available information including ED/hospital records/notes and public records)

— See Manual of Operations for expanded definitions

 None noted Yes (check all that apply)

- Anaphylaxis
- Chemical poisoning (intentional or unintentional, includes carbon monoxide and toxic gases)
- Dialysis
- Drowning
- Drug poisoning (intentional or unintentional, includes alcohol)
- Electrocution (non-lightning)
- Excessive cold
- Excessive heat
- Foreign body obstruction
- Hanging
- Lightning
- Mechanical suffocation
- Non-traumatic exsanguination
- Radiation exposure
- Respiratory
- SIDS (sudden infant death syndrome)
- Smoke inhalation
- Strangulation
- Terminal illness (includes end-stage diseases such as cancer)
- Trauma (includes blunt, penetrating or burns)
- Venomous stings
- Other contributing factors, specify:  
 (60)

continue to next page

**Episode Information:****Date** (*mm/dd/yyyy*) /  / **Time call received at dispatch** :  :  (*hh:mm:ss; 24hr clock*)

- From PCR/other     From dispatch     Unable to obtain (*Non-ROC agency 1<sup>st</sup> arrival*)

**CTC Episode ID:** -  - **Incident Number** (*optional*)**Site Linking ID** (*optional*)**C3. Structured Chart Review Tool for Assessment of Cerebral Performance Category at discharge:****a. Is the patient able to follow any simple commands or say any words?**

- No → skip to item C4 below  
 Yes

**b. Is the assistance of someone essential for all or part of the day for activities of daily living (dressing, preparing meals, local travel, shopping)?**

- No  
 Yes → skip to item C4 below

**c. Is the patient able to return to work or social activities in any capacity (even limited)?**

- No → skip to item C4 below  
 Yes

**d. Does the patient have any problems that are more than mild i.e. problems that prevent him/her from doing things that he/she would like to do or have to do (dysphasia, hemiplegia, ataxia, dysarthria, memory, cognition, personality)?**

- No  
 Yes

**C4. Modified Rankin Scale at hospital discharge:**

- MRS0 -No symptoms at all.  
 MRS1 -No significant disability: *despite symptoms, able to carry out all usual duties and activities.*  
 MRS2 -Slight disability: *unable to carry out all previous activities but able to look after own affairs without assistance.*  
 MRS3 -Moderate disability: *requiring some help, but able to walk without assistance.*  
 MRS4 -Moderately severe disability: *unable to walk without assistance, and unable to attend to own bodily needs without assistance*  
 MRS5 -Severe disability: *bedridden, incontinent and requiring constant nursing care and attention.*  
 Death at discharge

Person responsible for data on this form:

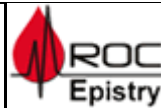

**Episode Information:**

**Date** (mm/dd/yyyy)  /  /       **Time call received at dispatch**  
 :  :  (hh:mm:ss; 24hr clock)  
 From PCR/other     From dispatch     Unable to obtain (Non-ROC agency 1<sup>st</sup> arrival)

**CTC Episode ID:**  -  -       **Incident Number** (optional)       **Site Linking ID** (optional)

**1. Does a continuous ECG recording exist for the EMS (includes fire) resuscitation?**

- No  
 Yes → For the entire resuscitation or only part?  
      Entire  
      Part of the resuscitation  
 → How many EMS recordings are there?

**2. Device used:**

| Order ECG Placed | Manufacturer          |                       |                       |                       |                                        | (Required)            |                       |                       |                       |                       |                       |                       |                       |                       |                       |                      |                                       |                                    |
|------------------|-----------------------|-----------------------|-----------------------|-----------------------|----------------------------------------|-----------------------|-----------------------|-----------------------|-----------------------|-----------------------|-----------------------|-----------------------|-----------------------|-----------------------|-----------------------|----------------------|---------------------------------------|------------------------------------|
|                  | Medtronic             | Philips               | Zoll                  | Other                 | If Other; specify <input type="text"/> | Feedback              |                       |                       |                       | Recording Exists      |                       | Reviewed              |                       | Attach Recording      |                       |                      |                                       |                                    |
|                  |                       |                       |                       |                       |                                        | Turned on             |                       | Muted                 |                       | Yes                   | No                    | Yes                   | No                    | Yes                   | No                    | File Name            |                                       |                                    |
|                  |                       |                       |                       |                       |                                        | Yes                   | No                    | <input type="text"/> | <input type="button" value="Browse"/> | <input type="button" value="DEL"/> |
| 1                | <input type="radio"/> | <input type="radio"/> | <input type="radio"/> | <input type="radio"/> | <input type="text"/>                   | <input type="radio"/> | <input type="text"/> | <input type="button" value="Browse"/> | <input type="button" value="DEL"/> |
| 2                | <input type="radio"/> | <input type="radio"/> | <input type="radio"/> | <input type="radio"/> | <input type="text"/>                   | <input type="radio"/> | <input type="text"/> | <input type="button" value="Browse"/> | <input type="button" value="DEL"/> |
| 3                | <input type="radio"/> | <input type="radio"/> | <input type="radio"/> | <input type="radio"/> | <input type="text"/>                   | <input type="radio"/> | <input type="text"/> | <input type="button" value="Browse"/> | <input type="button" value="DEL"/> |

**3. Were any shocks delivered by EMS responders?**

- No  
 Yes → Number of shocks:

**4. Sequence of events:**

| Rhythm/Shock Event                              | NA                       | Time of Rhythm/Shock (hh:mm:ss)                                    | Rhythm (check one)         |                       |                       |                        |                       | Source (check one)    |                       |                       |                       |                       |
|-------------------------------------------------|--------------------------|--------------------------------------------------------------------|----------------------------|-----------------------|-----------------------|------------------------|-----------------------|-----------------------|-----------------------|-----------------------|-----------------------|-----------------------|
|                                                 |                          |                                                                    | VF/VT (includes AED shock) | PEA                   | Asystole              | AED-No shock, No strip | Cannot Determine      | Continuous ECG        | Snapshot ECG          | PCR                   |                       |                       |
| 1) 1st CA rhythm with Non EMS AED/defibrillator | <input type="checkbox"/> | <input type="text"/> : <input type="text"/> : <input type="text"/> | <input type="radio"/>      | <input type="radio"/> | <input type="radio"/> | <input type="radio"/>  | <input type="radio"/> | <input type="radio"/> | <input type="radio"/> | <input type="radio"/> | <input type="radio"/> | <input type="radio"/> |
| 2) 1st CA EMS rhythm                            | <input type="checkbox"/> | <input type="text"/> : <input type="text"/> : <input type="text"/> | <input type="radio"/>      | <input type="radio"/> | <input type="radio"/> | <input type="radio"/>  | <input type="radio"/> | <input type="radio"/> | <input type="radio"/> | <input type="radio"/> | <input type="radio"/> | <input type="radio"/> |

If PEA, indicate rate:  OR  Unknown/not noted

**5. ECG Analysis:**

Time first EMS machine turned on:  :  :  OR  Not available → **STOP HERE IF ONLY 1 DEVICE USED**

Time first EMS pads placed:  :  :

Time of arrest if EMS witnessed:  :  :

Time of advanced airway placement:  :  :  OR  Unable to determine     No advanced airway

Time resuscitation stopped due to death:  :  :  OR  Not applicable

Time ED arrival:  :  :  OR  Not applicable

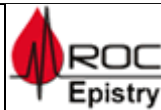

Episode Information:

Date (mm/dd/yyyy)
[ ]/[ ]/[ ]

Time call received at dispatch
[ ]:[ ]:[ ] (hh:mm:ss; 24hr clock)

From PCR/other From dispatch Unable to obtain (Non-ROC agency 1st arrival)

CTC Episode ID:
[ ]-[ ]-[ ]

Incident Number (optional)
[ ]

Site Linking ID (optional)
[ ]

6. Did the ECG provide CPR process measurements?

- No -> STOP HERE
Yes -> Complete the following section for 5 minutes or more of the resuscitative effort (for optional Ventilation study, complete for entire resuscitation effort)

Options for # seconds with No measures

- 1 - ROSC
2 - Unanalyzable

Table with columns: Device order, Start time (Auto fill), No ECG, # Vent, # Comp, Comp rate, CPR fraction, # secs with No measures -> Why, and optional columns: Comp depth, Comp release, Peak ET CO2, Capnography Vents, # secs missing.

Person responsible for data on this form: [ ]

**OPTIONAL FORM**

Complete this form:

-for each trauma patient where ventilation data was collected using capnometry and oximetry

Main data source: Capnometry data

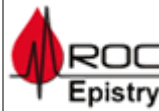**Trauma Ventilation**

Version 2.00.01

Date: 12/14/2006

Page 1 of 1

**Episode Information:****Date** (mm/dd/yyyy)
 /  / 
**Time call received at dispatch**
 :  :  (hh:mm:ss; 24hr clock)

 From PCR/other   
 From dispatch   
 Unable to obtain (Non-ROC agency 1<sup>st</sup> arrival)
**CTC Episode ID:**
 -  - 
**Incident Number** (optional)
**Site Linking ID** (optional)
**1. Ventilation monitor used** (check all that apply)
 Phillips → Feedback:  On  Off

 Zoll → Feedback:  On  Off

 Medtronic

 Other, specify:  (30)
**2. Ventilation Analysis:**
 Time Ventilation monitoring started:  :  :  OR  Not available → **STOP HERE**

 Time of advanced airway placement:  :  :  Indicate if → chemically paralyzed or sedated?  Yes  No  
 OR  Unable to determine  No advanced airway

 Time resuscitation stopped due to death:  :  :  OR  Not applicable

 Time ED arrival:  :  :  OR  Not applicable
**3. Complete the following section for the course of EMS care** (for at least 7 minutes):

| Min | Start time<br>--Auto fill--<br>(hh:mm:ss) | Peak<br>SaO <sub>2</sub> | Peak<br>ET CO <sub>2</sub> | Capno-<br>graphy<br>Vents | #<br>secs<br>missing | SBP                  |
|-----|-------------------------------------------|--------------------------|----------------------------|---------------------------|----------------------|----------------------|
| 1   | <input type="text"/>                      | <input type="text"/>     | <input type="text"/>       | <input type="text"/>      | <input type="text"/> | <input type="text"/> |
| 2   | <input type="text"/>                      | <input type="text"/>     | <input type="text"/>       | <input type="text"/>      | <input type="text"/> | <input type="text"/> |
| 3   | <input type="text"/>                      | <input type="text"/>     | <input type="text"/>       | <input type="text"/>      | <input type="text"/> | <input type="text"/> |
| 4   | <input type="text"/>                      | <input type="text"/>     | <input type="text"/>       | <input type="text"/>      | <input type="text"/> | <input type="text"/> |
| 5   | <input type="text"/>                      | <input type="text"/>     | <input type="text"/>       | <input type="text"/>      | <input type="text"/> | <input type="text"/> |
| 6   | <input type="text"/>                      | <input type="text"/>     | <input type="text"/>       | <input type="text"/>      | <input type="text"/> | <input type="text"/> |
| 7   | <input type="text"/>                      | <input type="text"/>     | <input type="text"/>       | <input type="text"/>      | <input type="text"/> | <input type="text"/> |
| 8   | <input type="text"/>                      | <input type="text"/>     | <input type="text"/>       | <input type="text"/>      | <input type="text"/> | <input type="text"/> |
| 9   | <input type="text"/>                      | <input type="text"/>     | <input type="text"/>       | <input type="text"/>      | <input type="text"/> | <input type="text"/> |
| 10  | <input type="text"/>                      | <input type="text"/>     | <input type="text"/>       | <input type="text"/>      | <input type="text"/> | <input type="text"/> |
| 11  | <input type="text"/>                      | <input type="text"/>     | <input type="text"/>       | <input type="text"/>      | <input type="text"/> | <input type="text"/> |
| 12  | <input type="text"/>                      | <input type="text"/>     | <input type="text"/>       | <input type="text"/>      | <input type="text"/> | <input type="text"/> |
| 13  | <input type="text"/>                      | <input type="text"/>     | <input type="text"/>       | <input type="text"/>      | <input type="text"/> | <input type="text"/> |
| 14  | <input type="text"/>                      | <input type="text"/>     | <input type="text"/>       | <input type="text"/>      | <input type="text"/> | <input type="text"/> |
| 15  | <input type="text"/>                      | <input type="text"/>     | <input type="text"/>       | <input type="text"/>      | <input type="text"/> | <input type="text"/> |
| 16  | <input type="text"/>                      | <input type="text"/>     | <input type="text"/>       | <input type="text"/>      | <input type="text"/> | <input type="text"/> |
| 17  | <input type="text"/>                      | <input type="text"/>     | <input type="text"/>       | <input type="text"/>      | <input type="text"/> | <input type="text"/> |
| 18  | <input type="text"/>                      | <input type="text"/>     | <input type="text"/>       | <input type="text"/>      | <input type="text"/> | <input type="text"/> |
| 19  | <input type="text"/>                      | <input type="text"/>     | <input type="text"/>       | <input type="text"/>      | <input type="text"/> | <input type="text"/> |
| 20  | <input type="text"/>                      | <input type="text"/>     | <input type="text"/>       | <input type="text"/>      | <input type="text"/> | <input type="text"/> |

 Person responsible for data on this form:
